# Title

**Cell type resolved co-expression networks of core clock genes in brain development.**

# Authors

Surbhi Sharma<sup>1,2</sup>, Asgar Hussain Ansari<sup>1,2</sup>, Soundhar Ramasamy<sup>1</sup>.

**Author for correspondence – Soundhar Ramasamy, [soundharramsay@gmail.com](mailto:soundharramsay@gmail.com)**

# Affiliations

**1** CSIR Institute of Genomics and Integrative Biology (IGIB), Mathura Road, New Delhi 110025, India.

**2** Academy of Scientific and Innovative Research (AcSIR), CSIR Human Resource Development Centre (CSIR-HRDC), Campus Sector 19, Kamla Nehru Nagar, Ghaziabad, Uttar Pradesh 201 002, India.

**Running title:** Co-expression networks of core clock genes in brain development.

**Keywords:** Circadian clock, neurogenesis, single-cell transcriptome, SCENIC, TSCAN.

# Abstract

The circadian clock regulates vital cellular processes by adjusting the physiology of the organism to daily changes in the environment. Rhythmic transcription of core Clock Genes (CGs) and their targets regulate these processes at the cellular level. Circadian clock disruption has been observed in people with neurodegenerative disorders like Alzheimer's and Parkinson's. Also, ablation of CGs during development has been shown to affect neurogenesis in both in vivo and in vitro models. Previous studies on the function of CGs in the brain have used knock-out models of a few CGs. However, a complete catalog of CGs in different cell types of the developing brain is not available and it is also tedious to obtain. Recent advancements in single-cell RNA sequencing (scRNA-seq) has revealed novel cell types and elusive dynamic cell states of the developing brain. In this study by using publicly available single-cell transcriptome datasets we systematically explored CGs-coexpressing networks (CGs-CNs) during embryonic and adult neurogenesis. Our meta-analysis reveals CGs-CNs in human embryonic radial glia, neurons and also in lesser studied non-neuronal cell types of the developing brain.

# Introduction

Self-sustained oscillatory expression of a core set of genes is known to drive circadian rhythms in organisms ranging from fungi and archaeobacteria to humans. At the molecular level, these rhythms arise from the waxing and waning of transcription factors which gives rise to rhythmicity in gene expression of their targets. In recent years, several groups have shown the association of key components of the molecular clock with neuronal function and diseases. Specifically, CLOCK protein, a part of the positive arm of the transcription-translation feedback loop has been shown to affect migration of neuronal cells (Fontenot et al. 2017). Mutations in CGs have been associated with various disorders; single nucleotide changes in NR1D1, PER1 and NPAS2 have been shown to be linked with the etiology of autism spectrum disorders (Goto et al. 2017; Nicholas et al. 2007). The reduced expression of CLOCK has been observed in epileptogenic tissues in humans (P. Li et al. 2017). Also, knock-out of BMAL1 the binding partner of CLOCK, in mice has been shown to lower the seizure threshold (Gerstner et al. 2014). Circadian disruption has also been observed in major depressive disorder (MDD), as the rhythmicity of CGs like BMAL1, PER1-2-3, NR1D1, BHLHE40-41 and DBP was disrupted in the postmortem brains derived from MDD patients (J. Z. Li et al. 2013).

The brain development and function is maintained in large part by embryonic and adult neurogenesis. During cortical development, heterogeneous populations of neural stems cells are present in the subventricular zone (SVZ) and ventricular zone (VZ), while differentiating neurons form cortical plate (CP). Previous studies have shown the involvement of CGs in neurogenesis; BMAL1 and PER2 are involved in cell cycle regulation in adult neurogenesis (Bouchard-Cannon et al. 2013). Also, BMAL1 knockout mice exhibit symptoms of ageing and perturbed ocular parameters (Yang et al. 2016). Similarly, conditional mutant mice of Clock or Bmal1 show delayed maturation of inhibitory parvalbumin neurons in the visual cortex (Kobayashi, Ye, and Hensch 2015).

Above studies clearly establish the role of CGs in the brain development, through genetic manipulation of selected CGs. Systematically extending the above strategies to all CGs is both laborious and time consuming. In case of the developing human brain it is further complicated due to ethical reasons. In this study we analyzed scRNA-seq datasets of embryonic and adult neurogenic niches to comprehensively explore the cell type identity and expression dynamics of CGs in neurogenesis using pseudotime analysis. Since most of the CGs function as transcription factors (TFs) with a wide range of genomic targets (Koike et al. 2012), we also identified their co-expressing networks (CNs). For pseudotime and co-expression analysis we used TSCAN and SCENIC respectively (Figure1& refer methods). Our analysis reveals CGs-CN enrichment in distinct cell types of the neurogenic niches thereby providing framework for future studies on their role in neurodevelopmental disorders. In addition to CGs-CN we also provide CNs of all transcription factors as a resource for future investigations.

## Results

CGs that from the focus of this study are listed in supplementary Table S1.

### Expression dynamics of CGs-CNs in mouse embryonic cortex E15.5

Embryonic neurogenesis is characterized by the rapid proliferation of neural stem cells. These cells divide symmetrically and expand the pool of neurogenic stem cells during the initial stages of neurogenesis. Later stages of embryonic neurogenesis are characterized by asymmetric divisions to give rise to neurons via intermediate progenitor cells (Götz and Huttner 2005). In contrast to embryonic neurogenesis, adult neurogenesis is restricted to specialized regions like SVZ and SGZ (Petrik and Encinas 2019). Apart from giving rise to neurons and glia, embryonic neural stem cells also serve as the source of adult neural stem cells. We intended to analyze the expression of CGs with cell type identity and expression dynamics in mouse embryonic and adult neurogenesis.

To study the CGs expression dynamics during embryonic neurogenesis we have used a single-cell transcriptome dataset of mice generated by Yuzwa et. al., which encompass embryonic timepoints: E11.5, E13.5, E15.5 and E17.5 days (Yuzwa et al. 2017). Using TSCAN (Ji and Ji 2016), neural progenitors and differentiating neuron clusters were identified from the above datasets. Pax6 and Tubb3 marker genes were used to identify neural progenitors and differentiating neurons respectively. Further these cells were pseudotime aligned with neural progenitors at the start and differentiating neurons at the end. Upon this neurogenesis trajectory aligned by pseudotime, statistical significance of expression dynamics of CGs was calculated. Out of all the developmental time points studied, only E15.5 showed statistically significant expression dynamics of three CGs – Rorb, Nfil3 and Csnk1e (Figure 2A). Except for Csnk1e, the two CGs expressions were high along the pseudotime associated with differentiated neurons.

Applying the co-expression analysis workflow on E15.5 dataset revealed two gene modules: Hlf(21g) and Rorb(51g) (Figure 2B). Hitzler JK et al earlier hypothesized the role of Hlf in neuronal differentiation based on its expression pattern in diverse regions of developing mouse brain (Hitzler et al. 1999), also experimental models of epilepsy show downregulation of Hlf (Rambousek et al. 2020). Rorb, shows expression in the L4 region of the mouse and human brain (Zeng et al. 2012). It also plays a vital role in the development and organization of the whisker barrel in rodent brain (Clark et al. 2020). These studies provide hints for involvement of Hlf and Rorb in the brain development, additionally our analysis discloses their underlying gene regulatory network (Figure 2C & S1). Out of 21 genes in the Hlf module (Figure 2C), Ntrk2 was previously reported in the GeneMANIA co-expression database.

### Expression dynamics of CGs-CNs in the neurogenic niches of adult mouse brain

In the adult brain, neurogenesis occurs in restricted niches: sub granular zone (SGZ) of the

hippocampus and sub ventricular zone (SVZ) near the lateral ventricles (Doetsch, García-Verdugo, and Alvarez-Buylla 1999; Kriegstein and Alvarez-Buylla 2009). The periodic activation of qNSCs in SGZ/SVZ produces mature neurons migrating to deep layers of dentate gyrus (DG) and olfactory bulb respectively, whose homeostasis plays a vital role in learning, memory formation and emotion regulation (van Praag, Kempermann, and Gage 1999; Toda et al. 2019). SGZ and SVZ regions are shown to have expressions of CGs (Bouchard-Cannon et al. 2013). Using publicly available scRNA-seq data and pseudotime analysis, we studied the CGs expression dynamics during adult neurogenesis.

For pseudotime ordering of SVZ (Llorens-Bobadilla et al. 2015) we used known marker genes like *Id3* and *Egfr* for quiescent and activated NSCs respectively and *Dcx* for differentiated neurons (Figure 2D). Most of the CGs analyzed showed significant enrichment in initial stages of pseudotime which corresponds to the transition from quiescent to activated neural stem cells. Though most of the CGs analyzed showed enrichment during early stages of adult neurogenesis, *Csnk1e* showed reverse trend of enrichment, with higher expression in the later stages of pseudotime corresponding to the birth of differentiated neurons.

Besides SVZ, we also analyzed SGZ, the other prominent adult neurogenic niche using scRNA-seq data (Shin et al. 2015). It also showed enrichment of CGs expression during early stages of neurogenesis (Figure S2), though the expression dynamics was not as evident as in SVZ. Both SVZ and SGZ showed enrichment of *Csnk1e* during later stages of adult neurogenesis.

Our co-expression analysis on SVZ and SGZ, revealed CGs-CNs only in SVZ datasets as none of the predicted CNs of SGZ datasets passed the AUCell scoring threshold. In SVZ, the co-expression analysis revealed two distinct CGs-CNs: *Dbp(31g)* and *Rorb(28g)* active during early stages of adult neurogenesis (Figure 2E). The detailed analysis of the *Dbp* module (Figure 2F) revealed 5 of its target genes (*Paip1*, *Eci1*, *Ssbp2*, *Cst3* and *Ndr2*) to be documented in the GeneMANIA. Among the above genes, *Ndr2* expression was previously reported in SVZ (L. Liu et al. 2012).

## **Expression dynamics of CGs-CNs in developing human brain**

The development of human brain and maturation lasts upto to 20 years (Peña-Melian 2000), while embryonic and fetal developmental changes range from 0-8 and 8-24 post-conception week (pcw) respectively (Silbereis et al. 2016). To identify CGs-CNs in early human brain development, we analyzed the scRNA-seq dataset generated by Nowakowski et al. (Nowakowski et al. 2017). The dataset includes prefrontal cortex (PFC) and primary visual cortex (V1), with ages ranging from 5 to 37pcw. In total, from 48 samples they broadly identified 11 major cell types. Their dataset is also available as an interactive web browser (<https://cells.ucsc.edu>). We applied co-expression analysis workflow on their dataset and used the cell cluster information provided by authors.

Our co-expression analysis revealed four CGs-CNs: BHLHE41(193g), BHLHE40(57g), RORB(12g) and NR1D2(14g) (Figure 3A).

Interestingly, the BHLHE41(193g)/BHLHE40(57g) module enriched predominantly in non-neuronal cell types like mural, microglial and truncated radial glia (tRG) cluster (Figure 3A). Few topmost genes co-expressing with BHLHE41 (Figure 3C) included P2RY12, CLEC7A, ATP8B4 and FYB. P2RY12 functions as a receptor for nucleotides which are released in response to CNS (Haynes et al. 2006) and blood brain barrier injury (Lou et al. 2016) to assist chemotaxis of microglia to the site of injury. CLEC7A has been shown to be linked with beta amyloid disease progression (Wirz et al. 2013). Genes including CLEC7A, P2RY12 and FYB serve as marker of microglia and we reveal their co-expression with BHLHE41 in our analysis. In BHLHE40(57g) module (Figure 3D), S100A4 was one of the co-expressing target genes, with reported co-expression in GeneMANIA. It also acts as a biomarker of glioblastoma (Chow et al. 2017). Among the top connected genes in the same module we observed HPGDS, which is known to localize to microglia and upregulated in Alzheimer's (Mohri et al. 2007).

The RORB(12g) module (Figure 3E) showed enrichment in medial ganglionic eminence-radial glia cluster 1 (MGE-RG1) and excitatory neurons-PFC 1 (EN-PFC1) cluster, the RORB module was also captured in the developing cortex and SVZ dataset of mouse. Comparison of the target genes of the RORB module in mouse and humans revealed MEF2C-RORB gene pair co-expression in mouse and human embryonic cortical neurogenesis. Both genes are known to play a vital role in corticogenesis (H. Li et al. 2008), with mutations in MEF2C causing mental retardation disorder (Zweier et al. 2010).

NR1D2(14g) expression was enriched in radial glia early (RG-early), intermediate progenitor cells (IPC-div2), medial ganglionic eminence-intermediate progenitor cells (MGE-IPC1) and astrocytes (Figure 3A). Knockdown of NR1D2 in adult murine neural stem cells has been shown to affect neural differentiation (Shimozaki 2018). The topmost target genes of the NR1D2 module included SLC35F2, ELF1, PON2, KPNA2 and EEF1B2 (Figure 3F). These genes are involved in vital neuronal functions like SLC35F2 in transport across blood brain barrier (Mochizuki et al. 2020), ELF1 in neurite growth (Gao et al. 1996) and PON2 imparts neuroprotection by scavenging superoxides (Costa et al. 2014).

The enrichment of four CGs-CNs in diverse cell types of the developing human brain prompted us to look for upstream regulators of CGs. Our search for upstream TFs co-expressing with CGs revealed only one significant upstream module of BHLHE41 [uTF(4g)+BHLHE41] (Figure 3G). We found four TFs namely TAL1, IRF8, IKZF1 and ZBTB24 which are documented to have regulatory role in microglia activation in response to injury (Masuda et al. 2012), aging (Wehrspaun, Haerty, and Ponting 2015) with TAL1 acting as a specific marker of human microglia (Galatro et al. 2017).

### **Expression dynamics of CGs-CNs during astrocyte genesis**

Previously, considered to be the support system of neurons in the brain, glial cells are being recognized as vital players in brain function. By promoting neuronal survival and modulating synapse function these cells actively participate in neuronal signal transduction. In particular, participation of astrocytes in circadian regulation has been recognized recently (Tso et al. 2017). The various functions of astrocytes like modulation of intracellular calcium levels, neurotransmitter release occur rhythmically. A study by (Lananna et al. 2018) has shown that astrocyte specific genetic deletion of *Bmal1* and behavioral disruption of rhythms in mice induces astrocyte activation. This effect is augmented when *Bmal1* is knocked out in both neurons and astrocytes. These studies point to an important role for astrocytes in maintaining circadian function in the brain.

We analyzed the total transcriptome of human fetal and adult brain derived astrocytes (Ye Zhang et al. 2016). In contrast to neurons, astrocytes showed an upregulation of CGs namely *CLOCK*, *CRY2*, *PER3*, *RORA*, *RORB*, *HLF*, *NR1D1*, *BHLHE40* and *BHLHE41* upon maturation (Figure 4A).

To strengthen this observation, we analyzed single-cell transcriptomic data of astrocytes derived from cortical spheroids (Sloan et al. 2017). Similar to neuronal differentiation analysis, we first constructed pseudotime trajectory of astrocyte differentiation and classified cell clusters using cellular markers of early and late stages of astrocyte development. Overall, we found an increased expression of all CGs except *RORB* and *RORC* in differentiated astrocytes (Figure 4B). This was in concordance with the trend seen in total RNA-seq of fetal and adult brain derived astrocytes.

The co-expression analysis of astrocyte scRNA-seq revealed the *BHLHE41* associated module with 97 genes to be the prominent module which showed enrichment in the later stages of astrocyte genesis (Figure 4C). *BHLHE41* acts as a transcriptional repressor in the circadian regulation of gene expression. Previous studies have reported association of mutations in *BHLHE41* with short sleep timing in both humans and experimental models (He et al. 2009; Pellegrino et al. 2014). Also, it shows high abundance in astrocytes as compared to neurons (Y. Zhang et al. 2014). Few of the topmost target genes in the *BHLHE41* module included *CLU*, *PSAP*, *BCL6*, *CRYAB*, *TPP1*, *TUBA4A* and *ADD3* (Figure 4D). The co-expression of a few genes like *ITPKB*, *SSPN* and *CRYAB* have been previously reported in the GeneMANIA. Additionally, we report various novel genes, specifically *GFAP*, a well known marker of astrocytes has been shown to be associated with the etiology of Alexander disease (Li et al. 2018). We also observed *CD44* co-expression with *BHLHE41*, *CD44* acts as a vital adhesion protein during astrocyte development (Y. Liu et al. 2004) and an increase in *CD44* positive astrocytes have been shown in Alzheimer's brain (Akiyama et al. 1993). Our approach highlights the potential regulation of these vital genes involved in astrocyte function by *BHLHE41*.

## Discussion



We combined pseudotime/co-expression analysis and explored potential regulatory contributions of CGs in the developing brain. Our workflow reveals CGs-CNs with cell type and cell state identity, a feat not possible from bulk RNA-seq based co-expression analysis. Also, high gene drop-out rates pertaining to scRNA-seq greatly impact the pseudotime analysis of low expressing genes like CGs. Therefore, we looked at co-expression modules which can accurately reflect variations in gene expression trends related to underlying biological processes (neurogenesis).

Our analysis of the murine and human embryonic brain scRNA-seq datasets reveals CGs-CNs of RORB, whose expression and role in cortical development is well studied in murine models. Further, many of the identified co-expression pairs are also reported in GeneMANIA with few of the target genes showing oscillatory expression in the adult brain (Seney et al. 2019), again highlighting the biological relevance of our analysis.

Many recent studies reveal the regulatory role of non-neuronal cell types in brain physiology, our analysis also identified four CGs-CNs in the non-neuronal population of the developing human brain. Among the four modules, BHLHE41 genes strongly co-express with genes having crucial function in microglia such as P2RY12 and CLEC7A. Further, BHLHE41 upstream co-expression analysis shows TFs with known microglia function like TAL1, IRF8, IKZF1 and ZBTB24. In addition, astrocytes derived from cortical spheroids show high expression of BHLHE41 module in mature astrocytes. Above results clearly favor BHLHE41 as a prioritized module for future biological validation in the context of glial biology.

Our meta analysis study uncovers CGs-CNs in diverse cell types of the developing brain. We believe that with exponential increase in new scRNA-seq datasets, with improved sample preparations such as pre-sorting of rare cell types and better sequencing depth will further reveal novel CGs-CNs. In future, similar analysis approach can be extended to generate CGs-CN map of all cell types in the human body.

## Methods

### Pseudotime analysis

TSCAN was used for pseudotime analysis (<https://github.com/zji90/TSCAN>). Single-cell gene expression matrix was subjected to TSCAN default workflow (Figure 1A), the workflow included preprocessing, dimensionality reduction followed by clustering. The genes with zero count were removed and scRNA-seq dropouts were handled by clustering genes having similar expression patterns using euclidean distance and complete linkage. The above preprocessing method was applied to all the datasets. Next, PCA was used for dimension reduction followed by clustering (mclust), yielding minimum spanning tree (MST). The identification of clusters was performed using marker genes. p-value and FDR was calculated on the TSCAN ordered cells with an FDR of <0.05. TSCAN assigned cell clusters, were inspected for a panel of marker genes from the publications of the respective datasets, while a single marker gene was used for

visualization purpose. If required, TSCAN cluster ordering was further manually corrected to place neural stem cell clusters as the starting point of the pseudotime.

The accession number of the datasets and their TSCAN path is provided in supplementary table 2 and 3 respectively.

## **Co-expression analysis**

Two steps in the pySCENIC (V0.10.3) (Aibar et al. 2017) pipeline were implemented in our co-expression analysis. First the co-expressing gene modules were identified using GRNBoost (<https://github.com/aertslab/GRNBoost>). Input for GRNBoost included a list of annotated transcription factors (<https://github.com/aertslab/pySCENIC/tree/master/resources>) and scRNA-seq expression matrix. In return GRNBoost outputs adjacency matrix with TFs, target genes and importance score. All the CGs (TFs) and its associated targets genes with importance scores greater than 99th percentile were subsetting as CGs-CNs. pySCENIC-GRNBoost was implemented through the command line in linux. All the original adjacency matrices are provided in supplementary data.

Next AUCell (V1.11.0) was used for scoring the activity of above CGs-CNs. AUCell uses “Area under curve” to score the activity of a given geneset (CGs-CNs) within expressed genes of scRNA-seq dataset. AUCell was implemented using R (4.0.2) using default parameters. The CGs-CNs which crossed the default threshold of AUCell geneset activity parameters are shown as binary CGs-CNs activity heatmap.

## **ScRNA-seq dataset description**

### **Mouse Cortex**

Yuzwa et al. performed drop-seq of CD1 mouse embryos at E11.5, 13.5, 15.5 and 17.5 stage. For E15.5 embryonic stage, 13 embryos were used and their brains dissected and dissociated for Drop-seq droplet collection. Following droplet collection single-cell libraries were prepared and sequenced on Illumina NextSeq500 platform.

### **Mouse Subventricular zone (SVZ)**

Babodilla et al performed microdissection of SVZ from C57BL/6 adult mice. GLAST<sup>+</sup> Prominin1<sup>+</sup> and PSA-NCAM<sup>+</sup> were used as marker to sort neural stem cells and neuroblasts from SVZ region. scRNA-seq libraries were prepared using Smart-seq2 and sequenced on HiSeq2000 platform. Trimmed reads were mapped to the mouse genome (ENSEMBL Release 78) using STAR\_2.4.0g followed by read quantification as FPKM.

### **Mouse Subgranular zone (SGZ)**



Shin et al. used transgenic mice expressing nuclear localized CFP under the control of nestin Nes-CFP<sup>nuc</sup>). The CFP containing cells marking qNSCs and their progenies were sorted under a fluorescent microscope using glass pipette. The single-cell libraries were prepared by SMART protocol and sequenced by HiSeq2500 followed by read mapping and quantification to give TPM matrix.

### **Developing human fetal cortex**

Nowakowski et al. performed stereotaxic based microdissection of brain regions like prefrontal cortex (PFC), primary visual cortex (V1) and MGE, the brain region aged from 5-37pcw. The single-cell suspension was prepared using FluidigmC1 followed by sequencing of single-cell libraries on the Illumina HiSeq2500 platform. The sequencing reads were aligned to GRCh38 and quantified to reveal transcript count as CPM.

### **Astrocyte spheroid**

Astrocyte lineage cells were purified from cortical spheroids derived from human iPSC line by Sloan et al. The immunopanning method was used to isolate astrocytes using HepaCAM as an astrocyte marker. The sequencing libraries were prepared from astrocytes derived using immunopanning method at 100, 130, 175 and 450 days of *in vitro* differentiation. Single-cell libraries were prepared using SMART-seq protocol and sequenced on NextSeq500 sequencing platform. The raw reads were aligned to hg19 human genome followed by transcript quantification as FPKM values.

### **Total RNA-seq**

#### **Human astrocytes**

Zhang et al. performed RNA-sequencing of astrocytes derived from juvenile (8-18years old) and adult (21-63 years old) human brain. The astrocytes from the brain tissue were purified in culture using immunopanning. Briefly, single-cell suspension of donor tissues was subjected to dishes coated with antibodies against various cell types, Hepa-CAM was used as a marker for astrocytes. The cDNA libraries from the two samples were sequenced on illumina NextSeq sequencer as 150bp paired end reads. The RNA-seq reads were mapped using TopHat2 to hg19 as the reference genome and expression level was estimated as FPKM.

### **Acknowledgements**

The authors acknowledge Dr. Beena Pillai and Dr. Souvik Maiti for their help in writing the manuscript and discussions. We are grateful to them for allowing us to communicate the manuscript. We also acknowledge the high performance computing (HPC) facility of CSIR-IGIB.

## Author contributions

SR and SS contributed equally. SR and SS conceptualized the work, SR and AHA performed the analysis, SR and SS prepared the manuscript.

## Supplementary files

TableS1: List of core clock genes analyzed in the study.

TableS2: Accession number of datasets used for the analysis.

TableS3: Details of TSCAN pseudotime clusters.

TableS4. Identities of cell clusters in developing human brain.

Table S5, S6, S7 and S8: GRNBoost derived adjacency matrix of mouse E15.5 cortex, mouse SVZ, developing human brain and astrocytes respectively.

Figure S1. Rorb co-expression network in mouse embryonic cortex E15.5.

Figure S2. Heatmap of pseudotime ordered cells in mouse SGZ.

## References

- Aibar, Sara, Carmen Bravo González-Blas, Thomas Moerman, Vân Anh Huynh-Thu, Hana Imrichova, Gert Hulselmans, Florian Rambow, et al. 2017. “SCENIC: Single-Cell Regulatory Network Inference and Clustering.” *Nature Methods* 14 (11): 1083–86.
- Akiyama, H., I. Tooyama, T. Kawamata, K. Ikeda, and P. L. McGeer. 1993. “Morphological Diversities of CD44 Positive Astrocytes in the Cerebral Cortex of Normal Subjects and Patients with Alzheimer’s Disease.” *Brain Research* 632 (1-2): 249–59.
- Bouchard-Cannon, Pascale, Lucia Mendoza-Viveros, Andrew Yuen, Mads Kærn, and Hai-Ying M. Cheng. 2013. “The Circadian Molecular Clock Regulates Adult Hippocampal Neurogenesis by Controlling the Timing of Cell-Cycle Entry and Exit.” *Cell Reports* 5 (4): 961–73.
- Chow, Kin-Hoe, Hee Jung Park, Joshy George, Keiko Yamamoto, Andrew D. Gallup, Joel H. Graber, Yuanxin Chen, et al. 2017. “S100A4 Is a Biomarker and Regulator of Glioma Stem Cells That Is Critical for Mesenchymal Transition in Glioblastoma.” *Cancer Research* 77 (19): 5360–73.
- Clark, Erin A., Michael Rutlin, Lucia Capano, Samuel Aviles, Jordan R. Saadon, Praveen Taneja, Qiyu Zhang, et al. 2020. “Cortical ROR $\beta$  Is Required for Layer 4 Transcriptional Identity and Barrel Integrity.” *eLife* 9 (August). <https://doi.org/10.7554/eLife.52370>.

- Costa, Lucio G., Rian de Laat, Khoi Dao, Claudia Pellacani, Toby B. Cole, and Clement E. Furlong. 2014. "Paraoxonase-2 (PON2) in Brain and Its Potential Role in Neuroprotection." *Neurotoxicology* 43 (July): 3–9.
- Doetsch, F., J. M. García-Verdugo, and A. Alvarez-Buylla. 1999. "Regeneration of a Germinal Layer in the Adult Mammalian Brain." *Proceedings of the National Academy of Sciences of the United States of America* 96 (20): 11619–24.
- Fontenot, Miles R., Stefano Berto, Yuxiang Liu, Gordon Werthmann, Connor Douglas, Noriyoshi Usui, Kelly Gleason, Carol A. Tamminga, Joseph S. Takahashi, and Genevieve Konopka. 2017. "Novel Transcriptional Networks Regulated by CLOCK in Human Neurons." *Genes & Development* 31 (21): 2121–35.
- Galatro, Thais F., Inge R. Holtman, Antonio M. Lerario, Ilia D. Vainchtein, Nieske Brouwer, Paula R. Sola, Mariana M. Veras, et al. 2017. "Transcriptomic Analysis of Purified Human Cortical Microglia Reveals Age-Associated Changes." *Nature Neuroscience* 20 (8): 1162–71.
- Gao, P. P., J. H. Zhang, M. Yokoyama, B. Racey, C. F. Dreyfus, I. B. Black, and R. Zhou. 1996. "Regulation of Topographic Projection in the Brain: Elf-1 in the Hippocamposeptal System." *Proceedings of the National Academy of Sciences of the United States of America* 93 (20): 11161–66.
- Gerstner, Jason R., George G. Smith, Olivia Lenz, Isaac J. Perron, Russell J. Buono, and Thomas N. Ferraro. 2014. "BMAL1 Controls the Diurnal Rhythm and Set Point for Electrical Seizure Threshold in Mice." *Frontiers in Systems Neuroscience* 8 (June): 121.
- Goto, Masahide, Makoto Mizuno, Ayumi Matsumoto, Zhiliang Yang, Eriko F. Jimbo, Hidenori Tabata, Takanori Yamagata, and Koh-Ichi Nagata. 2017. "Role of a Circadian-Relevant Gene NR1D1 in Brain Development: Possible Involvement in the Pathophysiology of Autism Spectrum Disorders." *Scientific Reports* 7 (March): 43945.
- Götz, Magdalena, and Wieland B. Huttner. 2005. "The Cell Biology of Neurogenesis." *Nature Reviews Molecular Cell Biology*. <https://doi.org/10.1038/nrm1739>.
- Haynes, Sharon E., Gunther Hollopeter, Guang Yang, Dana Kurpius, Michael E. Dailey, Wen-Biao Gan, and David Julius. 2006. "The P2Y12 Receptor Regulates Microglial Activation by Extracellular Nucleotides." *Nature Neuroscience* 9 (12): 1512–19.
- He, Ying, Christopher R. Jones, Nobuhiro Fujiki, Ying Xu, Bin Guo, Jimmy L. Holder Jr, Moritz J. Rossner, Seiji Nishino, and Ying-Hui Fu. 2009. "The Transcriptional Repressor DEC2 Regulates Sleep Length in Mammals." *Science* 325 (5942): 866–70.
- Hitzler, J. K., H. D. Soares, D. W. Drolet, T. Inaba, S. O'Connel, MG Rosenfeld, J. I. Morgan, and A. T. Look. 1999. "Expression Patterns of the Hepatic Leukemia Factor Gene in the

- Nervous System of Developing and Adult Mice.” *Brain Research* 820 (1-2): 1–11.
- Ji, Zhicheng, and Hongkai Ji. 2016. “TSCAN: Pseudo-Time Reconstruction and Evaluation in Single-Cell RNA-Seq Analysis.” *Nucleic Acids Research* 44 (13): e117.
- Kobayashi, Yohei, Zhanlei Ye, and Takao K. Hensch. 2015. “Clock Genes Control Cortical Critical Period Timing.” *Neuron* 86 (1): 264–75.
- Koike, Nobuya, Seung-Hee Yoo, Hung-Chung Huang, Vivek Kumar, Choogon Lee, Tae-Kyung Kim, and Joseph S. Takahashi. 2012. “Transcriptional Architecture and Chromatin Landscape of the Core Circadian Clock in Mammals.” *Science* 338 (6105): 349–54.
- Kriegstein, Arnold, and Arturo Alvarez-Buylla. 2009. “The Glial Nature of Embryonic and Adult Neural Stem Cells.” *Annual Review of Neuroscience* 32: 149–84.
- Lananna, Brian V., Collin J. Nadarajah, Mariko Izumo, Michelle R. Cedeño, David D. Xiong, Julie Dimitry, Chak Foon Tso, et al. 2018. “Cell-Autonomous Regulation of Astrocyte Activation by the Circadian Clock Protein BMAL1.” *Cell Reports* 25 (1): 1–9.e5.
- Li, Hao, Jonathan C. Radford, Michael J. Ragusa, Katherine L. Shea, Scott R. McKercher, Jeffrey D. Zaremba, Walid Soussou, et al. 2008. “Transcription Factor MEF2C Influences Neural Stem/progenitor Cell Differentiation and Maturation in Vivo.” *Proceedings of the National Academy of Sciences of the United States of America* 105 (27): 9397–9402.
- Li, Jun Z., Blynn G. Bunney, Fan Meng, Megan H. Hagenauer, David M. Walsh, Marquis P. Vawter, Simon J. Evans, et al. 2013. “Circadian Patterns of Gene Expression in the Human Brain and Disruption in Major Depressive Disorder.” *Proceedings of the National Academy of Sciences of the United States of America* 110 (24): 9950–55.
- Li, Li Li, E. Tian, Xianwei Chen, Jianfei Chao, Jeremy Klein, Qiuhao Qu, et al. 2018. “GFAP Mutations in Astrocytes Impair Oligodendrocyte Progenitor Proliferation and Myelination in an hiPSC Model of Alexander Disease.” *Cell Stem Cell*. <https://doi.org/10.1016/j.stem.2018.07.009>.
- Li, Peijun, Xiaoqin Fu, Nathan A. Smith, Julie Ziobro, Julian Curiel, Milagros J. Tenga, Brandon Martin, et al. 2017a. “Loss of CLOCK Results in Dysfunction of Brain Circuits Underlying Focal Epilepsy.” *Neuron* 96 (2): 387–401.e6.
- Liu, Lijuan, Ming Shi, Li Wang, Shuangxing Hou, Zhongliang Wu, Gang Zhao, and Yanchun Deng. 2012. “Ndr2 Expression in Neurogenic Germinal Zones of Embryonic and Postnatal Mouse Brain.” *Journal of Molecular Histology* 43 (1): 27–35.
- Liu, Ying, Steve S. W. Han, Yuanyuan Wu, Therese M. F. Tuohy, Haipeng Xue, Jingli Cai, Stephen A. Back, Larry S. Sherman, Itzhak Fischer, and Mahendra S. Rao. 2004. “CD44 Expression Identifies Astrocyte-Restricted Precursor Cells.” *Developmental Biology* 276 (1): 31–46.

- Llorens-Bobadilla, Enric, Sheng Zhao, Avni Baser, Gonzalo Saiz-Castro, Klara Zwadlo, and Ana Martin-Villalba. 2015. "Single-Cell Transcriptomics Reveals a Population of Dormant Neural Stem Cells That Become Activated upon Brain Injury." *Cell Stem Cell* 17 (3): 329–40.
- Lou, Nanhong, Takahiro Takano, Yong Pei, Anna L. Xavier, Steven A. Goldman, and Maiken Nedergaard. 2016. "Purinergic Receptor P2RY12-Dependent Microglial Closure of the Injured Blood–brain Barrier." *Proceedings of the National Academy of Sciences*. <https://doi.org/10.1073/pnas.1520398113>.
- Masuda, Takahiro, Makoto Tsuda, Ryohei Yoshinaga, Hidetoshi Tozaki-Saitoh, Keiko Ozato, Tomohiko Tamura, and Kazuhide Inoue. 2012. "IRF8 Is a Critical Transcription Factor for Transforming Microglia into a Reactive Phenotype." *Cell Reports* 1 (4): 334–40.
- Mochizuki, Tatsuki, Tadahaya Mizuno, Toshiki Kurosawa, Tomoko Yamaguchi, Kei Higuchi, Yuma Tega, Yoshitane Nozaki, Kenji Kawabata, Yoshiharu Deguchi, and Hiroyuki Kusuhara. 2020. "Functional Investigation of Solute Carrier Family 35, Member F2 (SLC35F2) in Three Cellular Models of the Primate Blood-Brain Barrier." *Drug Metabolism and Disposition: The Biological Fate of Chemicals*, November. <https://doi.org/10.1124/dmd.120.000115>.
- Mohri, Ikuko, Keiichi Kadoyama, Takahisa Kanekiyo, Yo Sato, Kuriko Kagitani-Shimono, Yuko Saito, Kinuko Suzuki, et al. 2007. "Hematopoietic Prostaglandin D Synthase and DP1 Receptor Are Selectively Upregulated in Microglia and Astrocytes Within Senile Plaques From Human Patients and in a Mouse Model of Alzheimer Disease." *Journal of Neuropathology and Experimental Neurology*. <https://doi.org/10.1097/01.jnen.0000240472.43038.27>.
- Nicholas, B., V. Rudrasingham, S. Nash, G. Kirov, M. J. Owen, and D. C. Wimpory. 2007. "Association of Per1 and Npas2 with Autistic Disorder: Support for the Clock Genes/social Timing Hypothesis." *Molecular Psychiatry* 12 (6): 581–92.
- Nowakowski, Tomasz J., Aparna Bhaduri, Alex A. Pollen, Beatriz Alvarado, Mohammed A. Mostajo-Radji, Elizabeth Di Lullo, Maximilian Haeussler, et al. 2017. "Spatiotemporal Gene Expression Trajectories Reveal Developmental Hierarchies of the Human Cortex." *Science* 358 (6368): 1318–23.
- Pellegrino, Renata, Ibrahim Halil Kavakli, Namni Goel, Christopher J. Cardinale, David F. Dinges, Samuel T. Kuna, Greg Maislin, et al. 2014. "A Novel BHLHE41 Variant Is Associated with Short Sleep and Resistance to Sleep Deprivation in Humans." *Sleep* 37 (8): 1327–36.
- Peña-Melian, A. 2000. "Development of Human Brain." *Human Evolution* 15 (1): 99–112.
- Petrik, David, and Juan M. Encinas. 2019. "Perspective: Of Mice and Men – How Widespread Is

- Adult Neurogenesis?" *Frontiers in Neuroscience*. <https://doi.org/10.3389/fnins.2019.00923>.
- Praag, H. van, G. Kempermann, and F. H. Gage. 1999. "Running Increases Cell Proliferation and Neurogenesis in the Adult Mouse Dentate Gyrus." *Nature Neuroscience* 2 (3): 266–70.
- Rambousek, Lukas, Tilo Gschwind, Carlos Lafourcade, Jean-Charles Paterna, Linda Dib, Jean-Marc Fritschy, and Adriano Fontana. 2020. "Aberrant Expression of PAR bZIP Transcription Factors Is Associated with Epileptogenesis, Focus on Hepatic Leukemia Factor." *Scientific Reports* 10 (1): 3760.
- Seney, Marianne L., Kelly Cahill, John F. Enwright 3rd, Ryan W. Logan, Zhiguang Huo, Wei Zong, George Tseng, and Colleen A. McClung. 2019. "Diurnal Rhythms in Gene Expression in the Prefrontal Cortex in Schizophrenia." *Nature Communications* 10 (1): 3355.
- Shimozaki, Koji. 2018. "Involvement of Nuclear Receptor REV-ERB $\beta$  in Formation of Neurites and Proliferation of Cultured Adult Neural Stem Cells." *Cellular and Molecular Neurobiology* 38 (5): 1051–65.
- Shin, Jaehoon, Daniel A. Berg, Yunhua Zhu, Joseph Y. Shin, Juan Song, Michael A. Bonaguidi, Grigori Enikolopov, et al. 2015. "Single-Cell RNA-Seq with Waterfall Reveals Molecular Cascades Underlying Adult Neurogenesis." *Cell Stem Cell* 17 (3): 360–72.
- Silbereis, John C., Sirisha Pochareddy, Ying Zhu, Mingfeng Li, and Nenad Sestan. 2016. "The Cellular and Molecular Landscapes of the Developing Human Central Nervous System." *Neuron* 89 (2): 248–68.
- Sloan, Steven A., Spyros Darmanis, Nina Huber, Themasp A. Khan, Fikri Birey, Christine Caneda, Richard Reimer, Stephen R. Quake, Ben A. Barres, and Sergiu P. Pașca. 2017. "Human Astrocyte Maturation Captured in 3D Cerebral Cortical Spheroids Derived from Pluripotent Stem Cells." *Neuron* 95 (4): 779–90.e6.
- Toda, Tomohisa, Sarah L. Parylak, Sara B. Linker, and Fred H. Gage. 2019. "The Role of Adult Hippocampal Neurogenesis in Brain Health and Disease." *Molecular Psychiatry*. <https://doi.org/10.1038/s41380-018-0036-2>.
- Tso, Chak Foon, Tatiana Simon, Alison C. Greenlaw, Tanvi Puri, Michihiro Mieda, and Erik D. Herzog. 2017. "Astrocytes Regulate Daily Rhythms in the Suprachiasmatic Nucleus and Behavior." *Current Biology: CB* 27 (7): 1055–61.
- Wehrspaun, Claudia C., Wilfried Haerty, and Chris P. Ponting. 2015. "Microglia Recapitulate a Hematopoietic Master Regulator Network in the Aging Human Frontal Cortex." *Neurobiology of Aging* 36 (8): 2443.e9–2443.e20.
- Wirz, Kerstin T. S., Koen Bossers, Anita Stargardt, Willem Kamphuis, Dick F. Swaab, Elly M. Hol, and Joost Verhaagen. 2013. "Cortical Beta Amyloid Protein Triggers an Immune



Response, but No Synaptic Changes in the APP<sup>swe</sup>/PS1<sup>dE9</sup> Alzheimer's Disease Mouse Model." *Neurobiology of Aging* 34 (5): 1328–42.

Yang, Guangrui, Lihong Chen, Gregory R. Grant, Georgios Paschos, Wen-Liang Song, Erik S. Musiek, Vivian Lee, et al. 2016. "Timing of Expression of the Core Clock Gene Bmal1 Influences Its Effects on Aging and Survival." *Science Translational Medicine* 8 (324): 324ra16.

Yuzwa, Scott A., Michael J. Borrett, Brendan T. Innes, Anastassia Voronova, Troy Ketela, David R. Kaplan, Gary D. Bader, and Freda D. Miller. 2017. "Developmental Emergence of Adult Neural Stem Cells as Revealed by Single-Cell Transcriptional Profiling." *Cell Reports* 21 (13): 3970–86.

Zeng H, Shen EH, Hohmann JG, Oh SW, Bernard A, Royall JJ, Glattfelder KJ, Sunkin SM, Morris JA, Guillozet-Bongaarts AL, Smith KA, Ebbert AJ, Swanson B, Kuan L, Page DT, Overly CC, Lein ES, Hawrylycz MJ, Hof PR, Hyde TM, Kleinman JE, Jones AR. Large-scale cellular-resolution gene profiling in human neocortex reveals species-specific molecular signatures. *Cell*. 2012 Apr 13;149(2):483-96. doi: 10.1016/j.cell.2012.02.052. PMID: 22500809; PMCID: PMC3328777.

Zhang, Y., K. Chen, S. A. Sloan, M. L. Bennett, A. R. Scholze, S. O'Keefe, H. P. Phatnani, et al. 2014. "An RNA-Sequencing Transcriptome and Splicing Database of Glia, Neurons, and Vascular Cells of the Cerebral Cortex." *Journal of Neuroscience*. <https://doi.org/10.1523/jneurosci.1860-14.2014>.

Zhang, Ye, Steven A. Sloan, Laura E. Clarke, Christine Caneda, Colton A. Plaza, Paul D. Blumenthal, Hannes Vogel, et al. 2016. "Purification and Characterization of Progenitor and Mature Human Astrocytes Reveals Transcriptional and Functional Differences with Mouse." *Neuron*. <https://doi.org/10.1016/j.neuron.2015.11.013>.

Zweier, Markus, Anne Gregor, Christiane Zweier, Hartmut Engels, Heinrich Sticht, Eva Wohlleber, Emilia K. Bijlsma, et al. 2010. "Mutations in MEF2C from the 5q14.3q15 Microdeletion Syndrome Region Are a Frequent Cause of Severe Mental Retardation and Diminish MECP2 and CDKL5 Expression." *Human Mutation* 31 (6): 722–33.

## Figure legends

**Figure 1: Schematic depicting workflow of A) pseudotime & B) co-expression analysis using TSCAN and GRNBoost respectively.**

**Figure 2: Expression dynamics of CGs-CNs in mouse embryonic and adult neurogenesis**

A&D) Heatmap showing CGs (row) expression over pseudotime ordered cells (column) in neurogenesis trajectory of A) mouse E15.5 cortex, D) mouse sub ventricular zone (SVZ), top annotation denotes cell clusters assigned by TSCAN, bottom annotation denotes

TSCAN calculated pseudotime in ascending order. In heatmaps, M denoting marker genes, S and NS denoting statistically significant and non-significant pseudotime expression dynamics respectively.

B&E) Binary activity heatmap of CG modules over pseudotime aligned neurogenesis trajectory of B) mouse E15.5 cortex E) mouse SVZ. Top annotation denotes cell clusters assigned by TSCAN, bottom annotation denotes TSCAN calculated pseudotime in ascending order.

C&F) Network plot showing CGs and its target genes. The edges of the target genes with highest importance score (red) to lowest (yellow). GeneMANIA reported co-expression gene pairs are indicated in blue color.

### **Figure3: Expression dynamics of CGs-CNs in developing human brain**

A) Binary activity heatmap of CGs modules over cell clusters of the developing human brain, cell clusters as annotated by Nowakowski et al. for cluster description refer table S4.

B) Heatmap showing gene expression of CGs over cell clusters, which showed significant enrichment score in the co-expression analysis. Cell clusters as annotated by Nowakowski et al. for cluster description refer table S4.

C, D, E & F) Network plots showing CGs and its targets in the developing human brain, the edges are placed from highest (red) to lowest (yellow) importance score of target genes. GeneMANIA reported co-expression gene pairs are highlighted in blue color, only top15 target genes in the BHLHE40/41 module are shown, target genes with known diurnal expression are underlined.

G) Binary activity heatmap of upstream TFs co-expressing with BHLHE41 over cell clusters of the developing human brain, cell clusters as annotated by Nowakowski et al. for cluster description refer table S4.

H) Heatmap showing gene expression of upstream TFs co-expressing with BHLHE41, which showed significant enrichment score in the co-expression analysis. Cell clusters as annotated by Nowakowski et al. for cluster description refer table S4.

### **Figure 4: Expression dynamics of CGs-CNs during astrocyte genesis**

A) Heatmap showing CGs expression in fetal and adult brain derived astrocytes profiled by total RNA-seq. TOP2A and AQP4 represent marker genes associated with early and late stages of astrocyte development respectively.

B) Heatmap showing CGs (row) expression over pseudotime ordered cells (column) derived from astrocytic spheroid, M denoting marker genes, S and NS depicting genes showing statistically significant and non-significant pseudotime expression dynamics respectively. Top annotation denotes cell clusters assigned by TSCAN, bottom annotation denotes TSCAN calculated pseudotime in ascending order.

C) Binary activity heatmap of CGs modules over pseudotime aligned trajectory of astrocyte

genesis. Top annotation denotes cell clusters assigned by TSCAN, bottom annotation denotes TSCAN calculated pseudotime in ascending order.

D) Network plot of BHLHE41 module in astrocytes, the edges are placed from highest (red) to lowest (yellow) importance score of target genes. GeneMANIA reported co-expression gene pairs are highlighted in blue color, only top15 target genes are shown.

## Figure 1

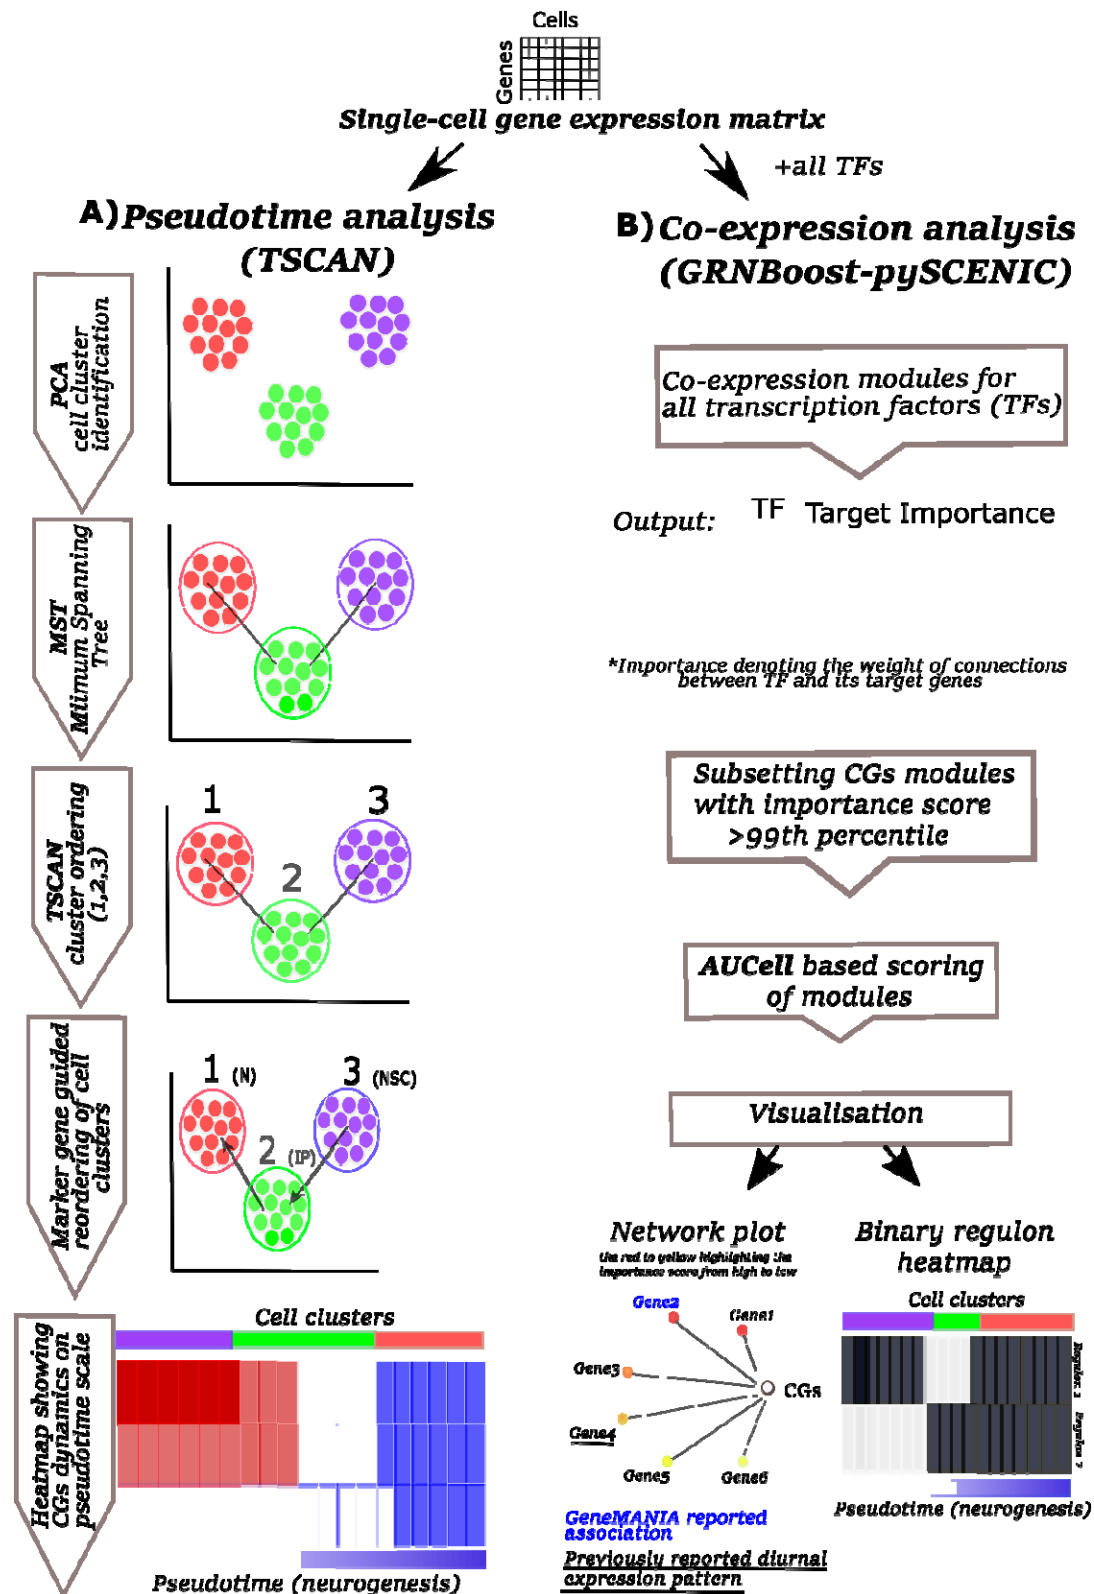

Figure 2



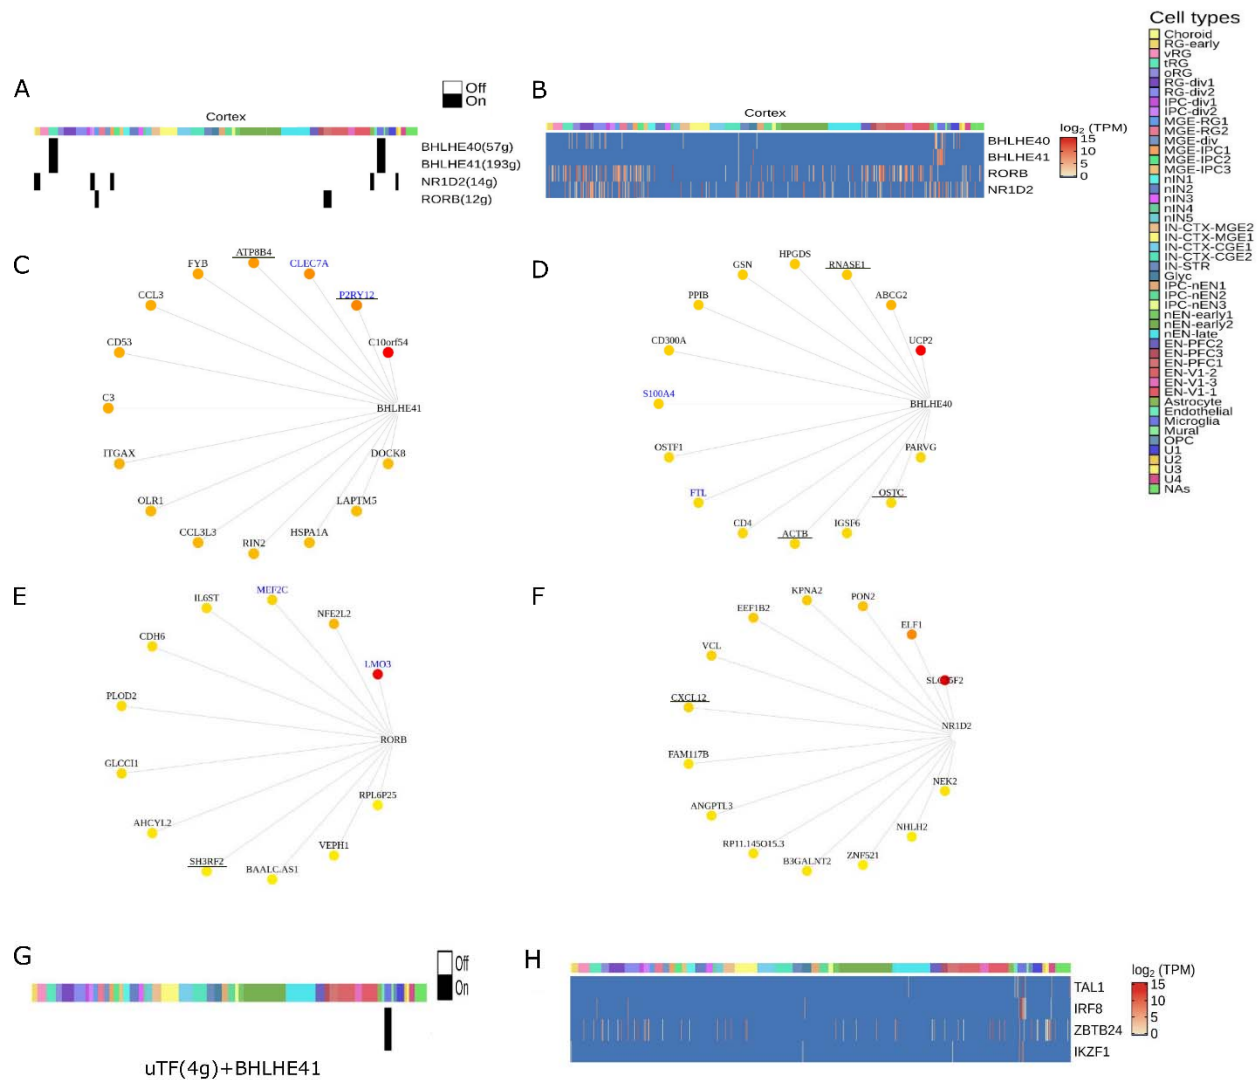

**Figure 4**



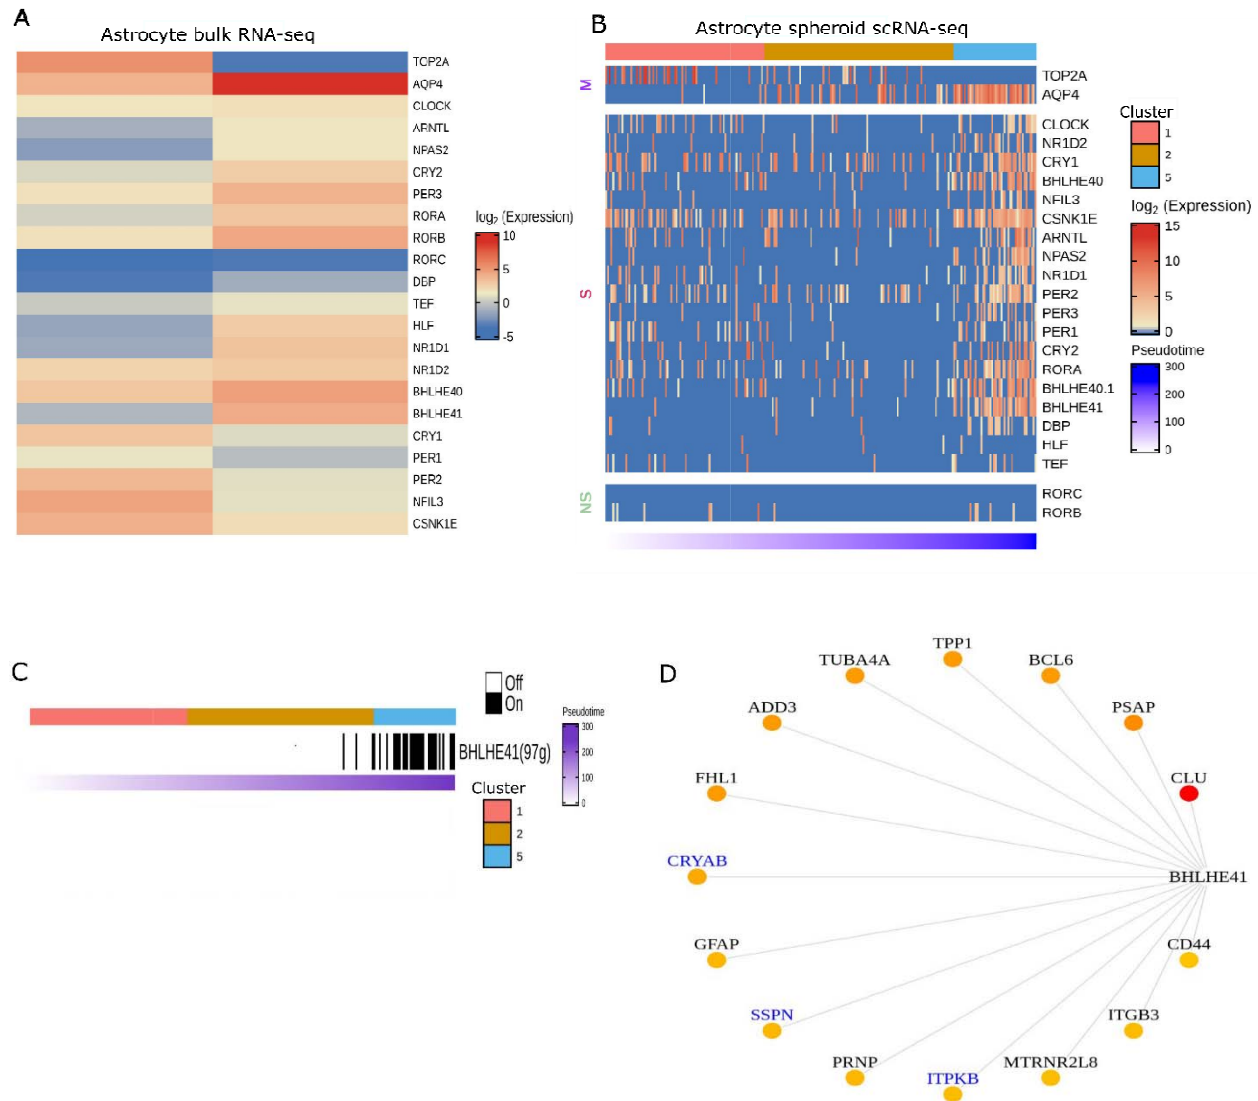

Source: https://biorxiv.org/content/10.1101/2020.12.30.424790v1.full.pdf
